# Supplementary material for: Perovskites decorated with oxygen vacancies and Fe–Ni alloy nanoparticles as high-efficiency electrocatalysts for the oxygen evolution reaction
Source: Royal Society of Chemistry journal article supplement (doi:10.1039/c7ta05404a), 2017-01-01
Supplement: c7ta05404a1.pdf [file c7ta05404a1.pdf]

## Electronic Supplementary Information (ESI)

### Perovskite decorated with oxygen vacancies and Fe-Ni alloy nanoparticles as high-efficiency electrocatalyst for oxygen evolution reaction

Kaiyue Zhu,<sup>‡ab</sup> Tao Wu,<sup>‡c</sup> Mingrun Li,<sup>a</sup> Ruifeng Lu,<sup>c</sup> Xuefeng Zhu<sup>\*a</sup> and Weishen Yang<sup>a</sup>

<sup>a</sup> *State Key Laboratory of Catalysis, Dalian Institute of Chemical Physics, Chinese Academy of Sciences, Dalian 116023, P R China.*

<sup>b</sup> *University of Chinese Academy of Sciences, Beijing, 100049, P R China*

<sup>c</sup> *Department of Applied Physics, Nanjing University of Science and Technology, Nanjing, 210094, P R China.*

<sup>‡</sup> *These authors have contributed equally.*

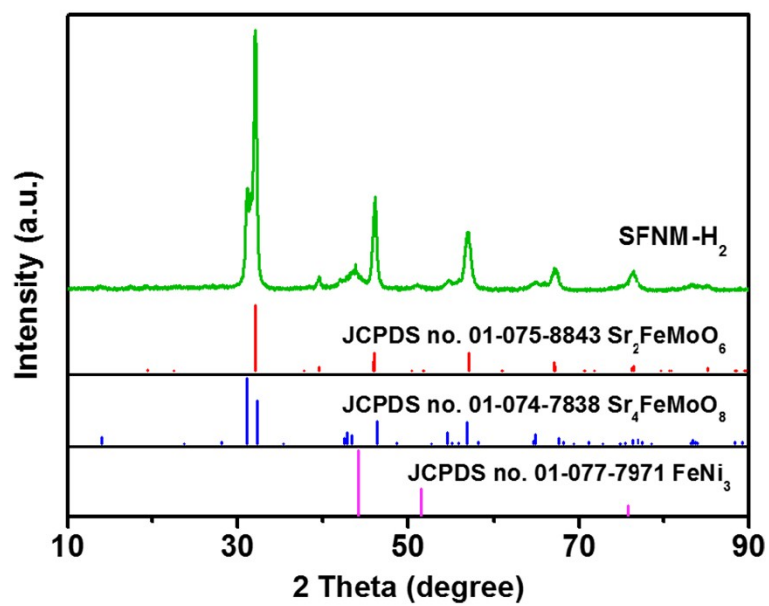

Fig. S1 Powder X-ray diffraction patterns of SFNM-H<sub>2</sub>.

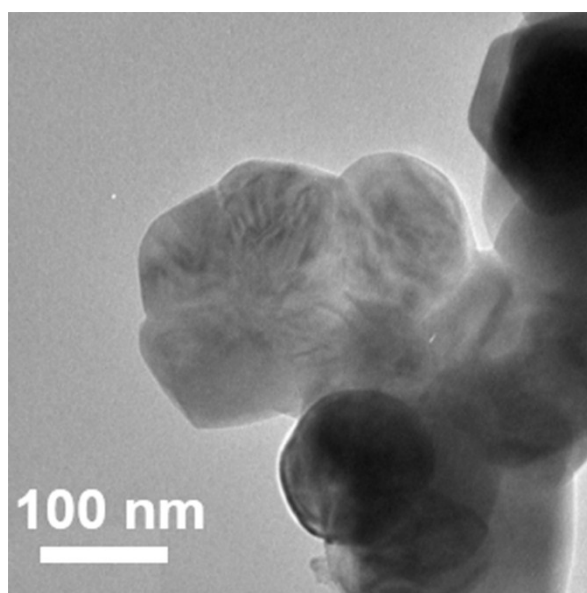

**Fig. S2** TEM image of SFNM.

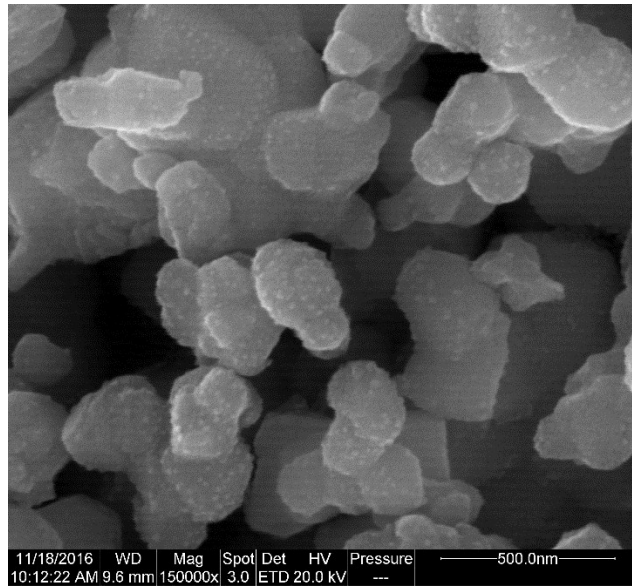

**Fig. S3** SEM image of SFNM-5% $H_2$ /Ar.

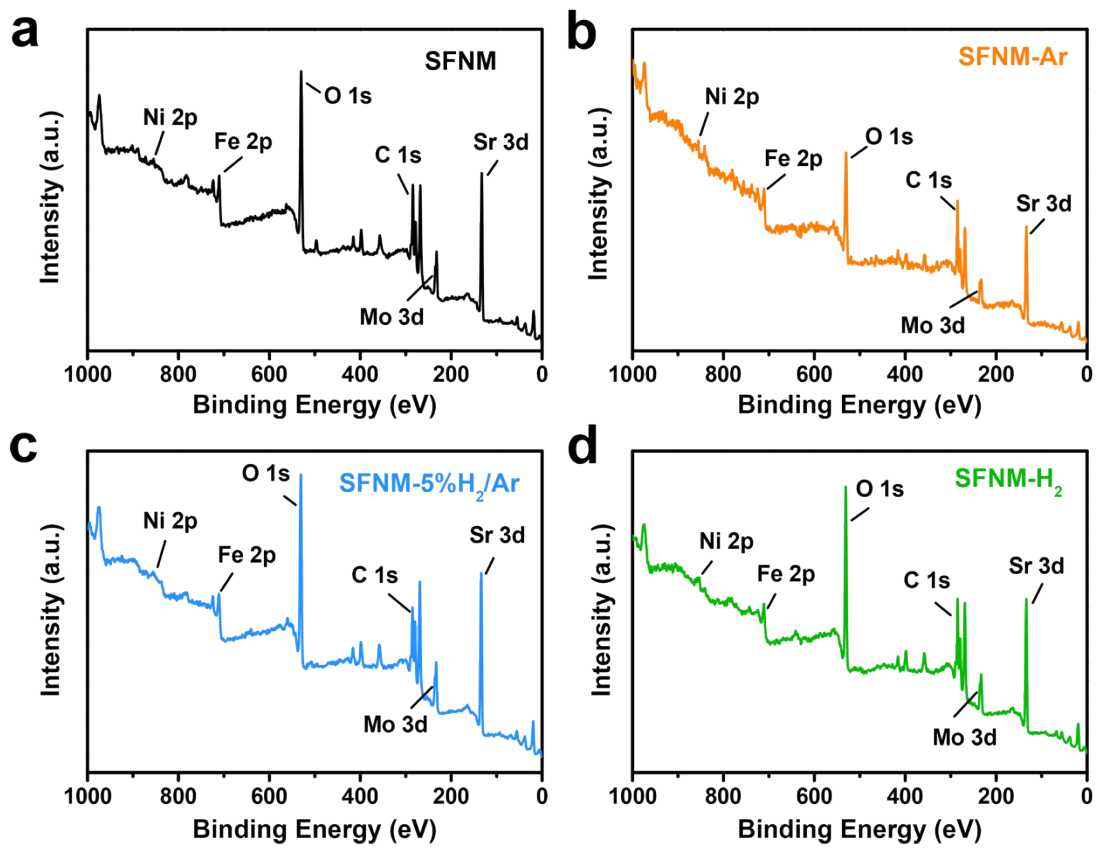

Fig. S4 XPS survey spectra of SFNM, SFNM-Ar, SFNM-5% $H_2$ /Ar and SFNM- $H_2$ .

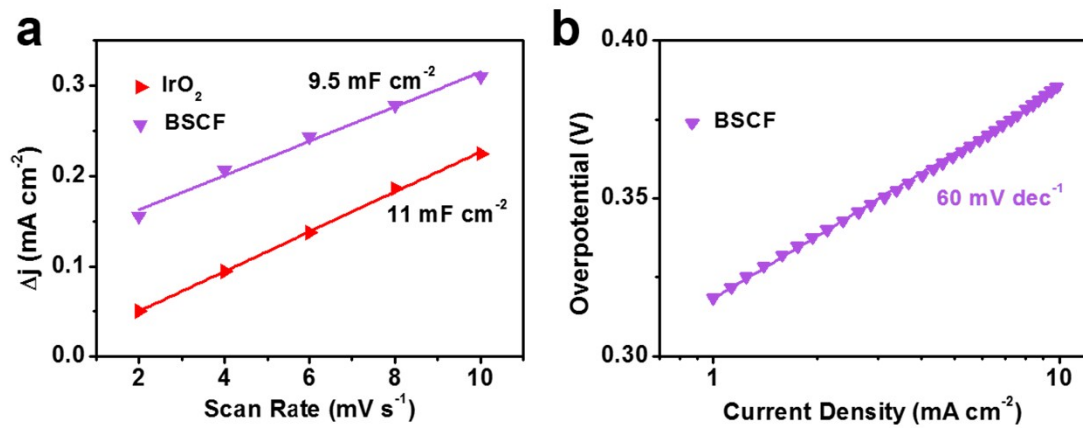

**Fig. S5** (a) Charging current density differences  $\Delta j$  plotted against scan rates of IrO<sub>2</sub> and BSCF. (b) Tafel plots of BSCF.

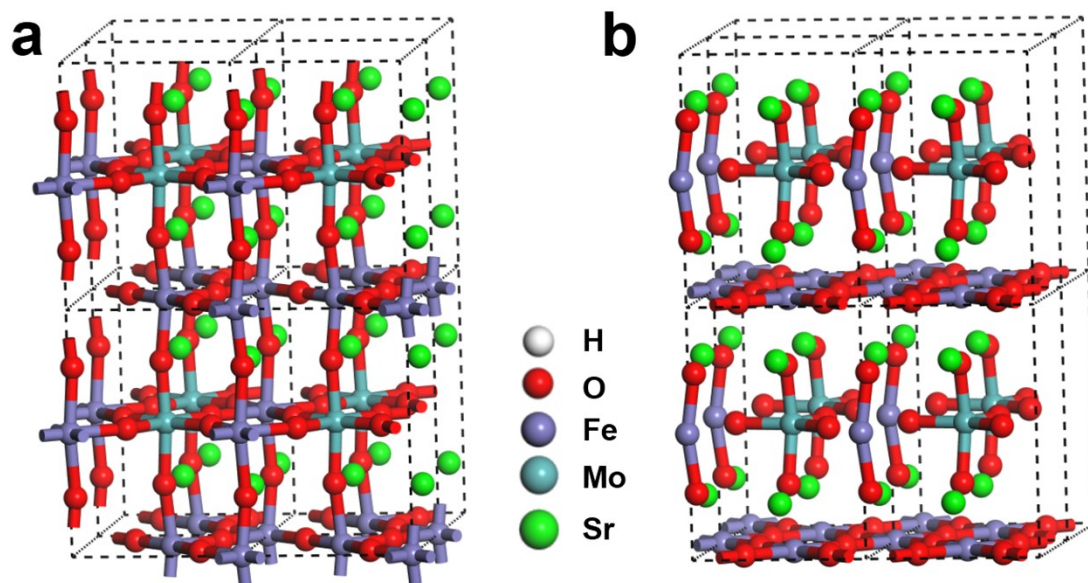

**Fig. S6** Geometries of SFM with oxygen vacancies near Fe sites (a) and near Mo sites (b), respectively. When there are oxygen vacancies near Mo sites, the structure of SFM perovskite falls apart indicating oxygen vacancies are less prone to appear near Mo site.

**Table S1.** Ni 2p<sub>3/2</sub> XPS fitting data for SFNM, SFNM-Ar, SFNM-5%H<sub>2</sub>/Ar and SFNM-H<sub>2</sub>. The unit of binding energies is eV.

| catalysts                 | Ni <sup>0</sup> | Ni <sup>2+</sup> | Ni <sup>3+</sup> | S1 <sup>[a]</sup> |
|---------------------------|-----------------|------------------|------------------|-------------------|
| SFNM                      |                 | 855.0            | 856.5            | 861.6             |
| SFNM-Ar                   |                 | 855.0            |                  | 862.3             |
| SFNM-5%H <sub>2</sub> /Ar | 852.2           | 854.9            |                  | 861.4             |
| SFNM-H <sub>2</sub>       | 852.2           | 854.9            |                  | 860.7             |

<sup>[a]</sup>S1 is the satellite peak of Ni 2p<sub>3/2</sub>.

**Table S2.** Fe 2p XPS fitting data for SFNM, SFNM-Ar, SFNM-5%H<sub>2</sub>/Ar and SFNM-H<sub>2</sub>. The unit of binding energies is eV.

| catalysts                 | Fe 2p <sub>3/2</sub> |                  |                  |                  |                   | Fe 2p <sub>1/2</sub> |                  |                  |                  |                   |
|---------------------------|----------------------|------------------|------------------|------------------|-------------------|----------------------|------------------|------------------|------------------|-------------------|
|                           | Fe <sup>0</sup>      | Fe <sup>2+</sup> | Fe <sup>3+</sup> | Fe <sup>4+</sup> | S2 <sup>[b]</sup> | Fe <sup>0</sup>      | Fe <sup>2+</sup> | Fe <sup>3+</sup> | Fe <sup>4+</sup> | S3 <sup>[b]</sup> |
| SFNM                      |                      | 709.             | 710.             | 713.             | 718.              |                      | 722.             | 724.             | 726.             | 731.              |
|                           |                      | 4                | 6                | 4                | 5                 |                      | 9                | 3                | 8                | 4                 |
| SFNM-Ar                   |                      | 709.             | 710.             |                  | 718.              |                      | 722.             | 724.             |                  | 731.              |
|                           |                      | 3                | 6                |                  | 5                 |                      | 9                | 3                |                  | 4                 |
| SFNM-5%H <sub>2</sub> /Ar | 706.                 | 709.             | 710.             |                  | 716.              | 720.                 | 722.             | 724.             |                  | 731.              |
|                           | 8                    | 3                | 6                |                  | 8                 | 1                    | 9                | 3                |                  | 3                 |
| SFNM-H <sub>2</sub>       | 706.                 | 709.             | 710.             |                  | 716.              | 720.                 | 722.             | 724.             |                  | 731.              |
|                           | 8                    | 3                | 7                |                  | 0                 | 0                    | 9                | 3                |                  | 2                 |

<sup>[b]</sup>S2 and S3 are the satellite peaks of Ni 2p<sub>3/2</sub> and Ni 2p<sub>1/2</sub>, respectively.

*Note: From XPS spectra of Ni and Fe, the atomic ratios of Fe<sup>0</sup> and Ni<sup>0</sup> in SFNM-5%H<sub>2</sub>/Ar and SFNM-H<sub>2</sub> are 1.02 and 1.31, respectively. The ratios of Ni<sup>0</sup>:(Ni<sup>0</sup>+Ni<sup>2+</sup>) in SFNM-5%H<sub>2</sub>/Ar and SFNM-H<sub>2</sub> is 0.23 and 0.31, respectively. The ratios of Fe<sup>0</sup>:(Fe<sup>0</sup>+Fe<sup>2+</sup>+Fe<sup>3+</sup>) in SFNM-5%H<sub>2</sub>/Ar and SFNM-H<sub>2</sub> are 0.03 and 0.12, respectively. Although XPS obtains the surface information, the XPS results can also reflect that Ni-Fe alloy nanoparticles of SFNM-5%H<sub>2</sub>/Ar should be less than those of SFNM-H<sub>2</sub>, in accord with the results from XRD, SEM, HRTEM and Mapping.*



**Table S3.** Mo 3d XPS fitting data for SFNM, SFNM-Ar, SFNM-5%H<sub>2</sub>/Ar and SFNM-H<sub>2</sub>. The unit of binding energies is eV.

| catalysts                 | Mo 3d <sub>5/2</sub> |                  | Mo 3d <sub>3/2</sub> |                  |
|---------------------------|----------------------|------------------|----------------------|------------------|
|                           | Mo <sup>5+</sup>     | Mo <sup>6+</sup> | Mo <sup>5+</sup>     | Mo <sup>6+</sup> |
| SFNM                      |                      | 232.3            |                      | 235.4            |
| SFNM-Ar                   |                      | 232.3            |                      | 235.5            |
| SFNM-5%H <sub>2</sub> /Ar | 231.3                | 232.4            | 234.6                | 235.6            |
| SFNM-H <sub>2</sub>       | 231.4                | 232.4            | 234.7                | 235.6            |

**Table S4.** O 1s XPS fitting data for SFNM, SFNM-Ar, SFNM-5%H<sub>2</sub>/Ar and SFNM-H<sub>2</sub>. The unit of binding energies is eV.

| catalysts                 | O <sub>lattice</sub> | O <sub>ad</sub> |
|---------------------------|----------------------|-----------------|
| SFNM                      | 529.08               | 531.36          |
| SFNM-Ar                   | 529.14               | 531.36          |
| SFNM-5%H <sub>2</sub> /Ar | 529.24               | 531.36          |
| SFNM-H <sub>2</sub>       | 529.30               | 531.11          |
